# Supplementary material for: Anti-Inflammatory Effect of Sulforaphane on LPS-Activated Microglia Potentially through JNK/AP-1/NF-κB Inhibition and Nrf2/HO-1 Activation
Source: Cells. 2019 Feb 22;8(2):194. doi: 10.3390/cells8020194 (PMC6406309; doi:10.3390/cells8020194)

Article

# Anti-Inflammatory Effect of Sulforaphane on LPS-Activated Microglia Potentially through JNK/AP-1/NF- $\kappa$ B Inhibition and Nrf2/HO-1 Activation

Lalita Subedi <sup>1</sup>, Jae Hyuk Lee <sup>1</sup>, Silvia Yumnam <sup>1</sup>, Eunhee Ji <sup>2</sup> and Sun Yeou Kim <sup>1,3,4</sup>\*

<sup>1</sup> Laboratory of Pharmacognosy, College of Pharmacy, Gachon University, #191, Hambakmoero, Yeonsu-gu, Incheon 21936, Republic of Korea; [subedilali@gmail.com](mailto:subedilali@gmail.com) (L.S.); [wogur6378@naver.com](mailto:wogur6378@naver.com) (J.H.L.); [silviayumnam@gmail.com](mailto:silviayumnam@gmail.com) (S.Y.)

<sup>2</sup> Laboratory of Clinical Pharmacy, College of Pharmacy, Gachon University, #191, Hambakmoero, Yeonsu-gu, Incheon 21936, Republic of Korea; [ehji@gachon.ac.kr](mailto:ehji@gachon.ac.kr)

<sup>3</sup> Gachon Institute of Pharmaceutical Science, Gachon University, 191, Hambakmoe-ro, Yeonsu-gu, Incheon 21936, Korea

<sup>4</sup> Gachon Medical Research Institute, Gil Medical Center, Incheon 21565, Korea

\* Correspondence to: [sunnykim@gachon.ac.kr](mailto:sunnykim@gachon.ac.kr); Tel.: +82-32-820-4931; Fax: +82-32-820-4932

Received: date; Accepted: date; Published: date

## Supplementary Figure S1.

RAW 264.7 and THP-1 cells were pre-treated with SFN 30 min before LPS activation and incubated for 24 h to check the production of nitrite and cell viability, 6 h for the expression of iNOS/COX-2 and 30 min LPS activation for the evaluation of MAPK signaling proteins. (A-B) Nitrite production and cell viability in RAW 264.7 cell. (C-E) expression of iNOS/COX-2 and MAPK proteins in RAW 264.7 cell. (F-G) Nitrite production and cell viability in THP-1 cell. (H-I) expression of iNOS/COX-2 and MAPK proteins in THP-1 cell. All data are presented as the mean  $\pm$  standard error of the mean of three independent experiments. \*  $p < 0.05$ , \*\*  $p < 0.01$ , and \*\*\*  $p < 0.001$  indicate significant differences compared with treatment with LPS alone, while #  $p < 0.05$ , ##  $p < 0.01$ , and ###  $p < 0.001$  indicates significant differences compared with an untreated control group.

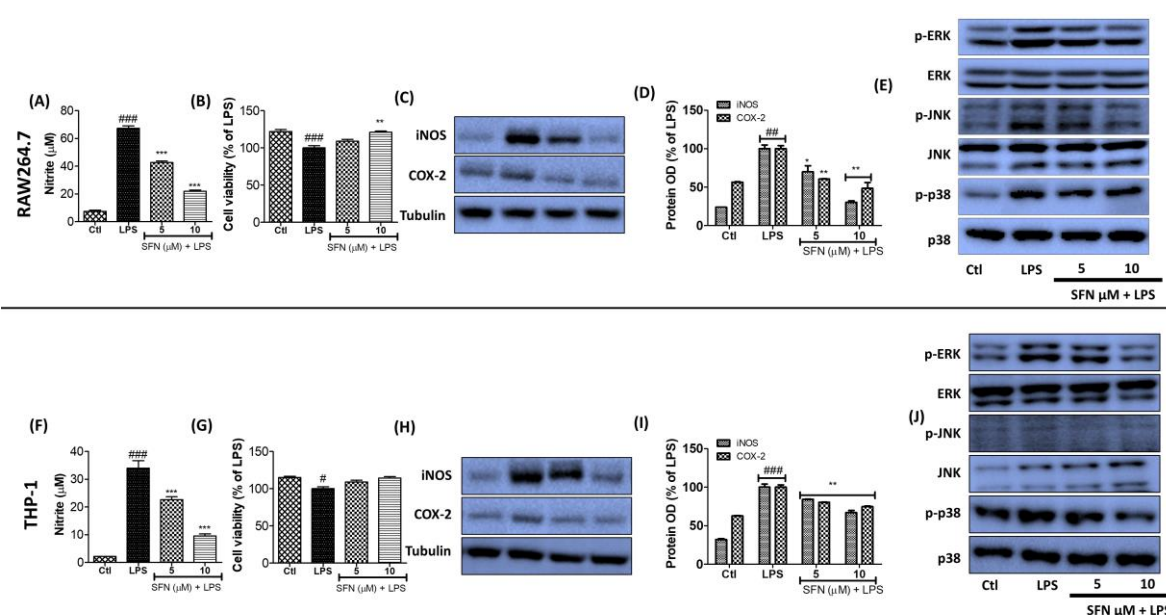

Supplement: Supplementary file 1 [file cells-08-00194-s001.pdf]
